# Supplementary material
Source: Springer Nature journal article supplement (https://www.springermedizin.de/resource/supplementary/12974_2011_388_MOESM4_ESM.pdf/9601546)

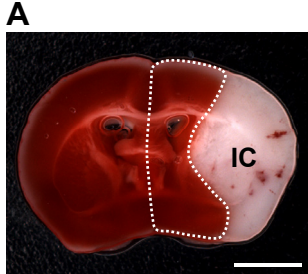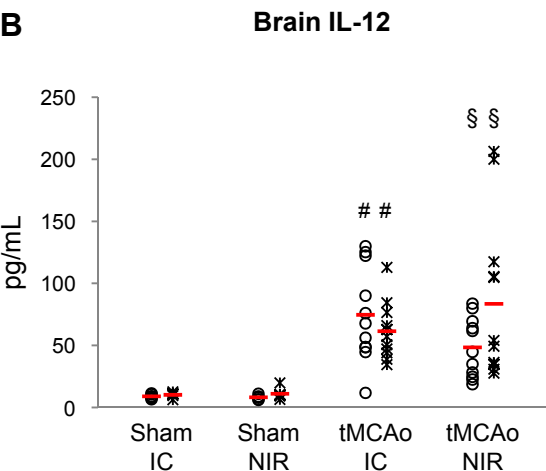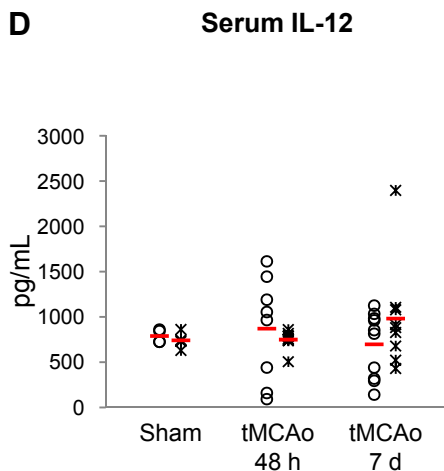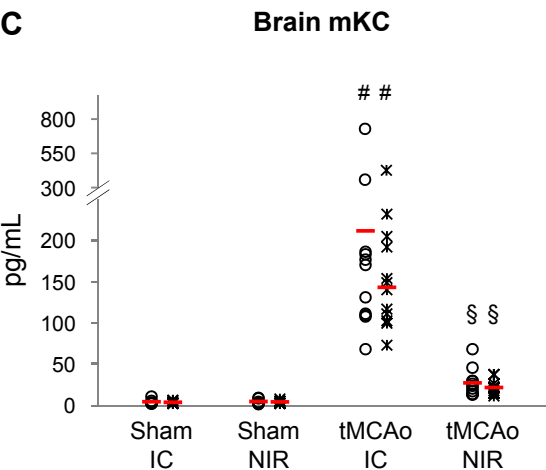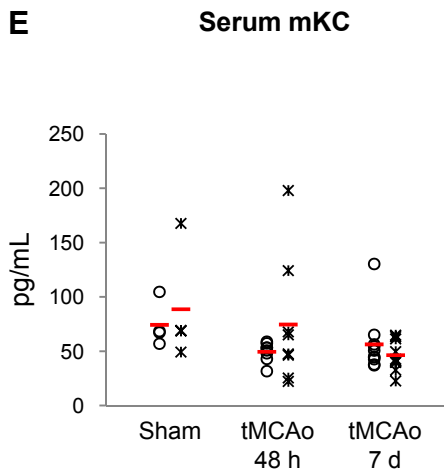

○ WT \* MIF-KO

Supplement: MOESM4 [file 9601546]
